# Supplementary material for: Cancer risk across mammals
Source: Nature. 2021 Dec 22;601(7892):263–7. doi: 10.1038/s41586-021-04224-5 (PMC8755536; doi:10.1038/s41586-021-04224-5)
Supplement: Supplementary file 1 — This file contains Supplementary Tables 1–4, which include a list of species excluded from the analyses due to being subject to domestication (Table 1), and sensitivity analyses performed to test the effect of within-species sample size (Table 2), test for collinearity issues (Table 3) and confirm the consistency of the results when high-leverage species are included in the analyses (Table 4). [file 41586_2021_4224_MOESM1_ESM.pdf]

---

## Supplementary information

---

# Cancer risk across mammals

---

In the format provided by the  
authors and unedited

**Supplementary Table 1 | List of species excluded from the analyses due to being subject to domestication.** Domestication is likely to affect cancer risk, body mass or life expectancy.

| Species                      | order          |
|------------------------------|----------------|
| <i>Atelerix_albiventris</i>  | Erinaceomorpha |
| <i>Bos_gaurus</i>            | Artiodactyla   |
| <i>Bos_grunniens</i>         | Artiodactyla   |
| <i>Bos_javanicus</i>         | Artiodactyla   |
| <i>Bos_taurus</i>            | Artiodactyla   |
| <i>Camelus_bactrianus</i>    | Artiodactyla   |
| <i>Canis_lupus</i>           | Carnivora      |
| <i>Capra_hircus</i>          | Artiodactyla   |
| <i>Cavia_porcellus</i>       | Rodentia       |
| <i>Chinchilla_lanigera</i>   | Rodentia       |
| <i>Equus_africanus</i>       | Perissodactyla |
| <i>Equus_asinus</i>          | Perissodactyla |
| <i>Equus_caballus</i>        | Perissodactyla |
| <i>Felis_catus</i>           | Carnivora      |
| <i>Lama_glama</i>            | Artiodactyla   |
| <i>Lama_guanicoe</i>         | Artiodactyla   |
| <i>Mephitis_mephitis</i>     | Carnivora      |
| <i>Mustela_putorius</i>      | Carnivora      |
| <i>Oryctolagus_cuniculus</i> | Lagomorpha     |
| <i>Ovis_aries</i>            | Artiodactyla   |
| <i>Rattus_norvegicus</i>     | Rodentia       |
| <i>Sus_scrofa</i>            | Artiodactyla   |
| <i>Vicugna_pacos</i>         | Artiodactyla   |
| <i>Vicugna_vicugna</i>       | Artiodactyla   |

**Supplementary Table 2. - Sensitivity analysis performed to test the effect of within-species sample size.** Models were performed to explore the consistency of results of weighted logistic regressions of non-zero cancer risks when using a different minimum threshold of number of individuals with available postmortem pathological records. Models were run with a minimum of 20, 40, 60, 80 and 100 individuals with available postmortem pathological records per species (N). Slopes, standard errors and p values are presented for all models. Please note the considerable decrease in the number of species involved in the analyses (n) with increased within-species threshold sample sizes.

| Number of individuals with available post-mortem pathological record |                               | N ≥ 20                | N ≥ 40                | N ≥ 60                | N ≥ 80                | N ≥ 100               |
|----------------------------------------------------------------------|-------------------------------|-----------------------|-----------------------|-----------------------|-----------------------|-----------------------|
|                                                                      |                               | β ± SE [p-value]      |
| <b>CMR</b>                                                           | <b>Weighted logistic reg.</b> |                       |                       |                       |                       |                       |
|                                                                      | Intercept                     | -7.11 ± 1.82 [0.0001] | -4.53 ± 2.8 [0.1106]  | -5.4 ± 3.76 [0.1567]  | -3.36 ± 4.49 [0.4589] | -2.55 ± 5.01 [0.6148] |
|                                                                      | Log body mass                 | -0.04 ± 0.05 [0.3754] | 0.04 ± 0.07 [0.5242]  | 0.04 ± 0.09 [0.6367]  | 0.06 ± 0.10 [0.5793]  | 0.02 ± 0.11 [0.8559]  |
|                                                                      | Log life expectancy           | 0.42 ± 0.23 [0.0688]  | 0.12 ± 0.36 [0.7491]  | 0.25 ± 0.48 [0.6037]  | -0.01 ± 0.57 [0.9916] | -0.09 ± 0.64 [0.8924] |
|                                                                      | <i>Number of species</i>      | n = 141               | n = 81                | n = 56                | n = 42                | n = 32                |
| <b>ICM</b>                                                           | <b>Weighted logistic reg.</b> |                       |                       |                       |                       |                       |
|                                                                      | Intercept                     | -7.27 ± 2.54 [0.0049] | -4.8 ± 4.03 [0.2378]  | -4.04 ± 5.17 [0.4388] | -3.73 ± 6.35 [0.5611] | -3.20 ± 6.61 [0.6321] |
|                                                                      | Log body mass                 | -0.09 ± 0.06 [0.1534] | -0.05 ± 0.10 [0.6025] | -0.07 ± 0.12 [0.5654] | -0.07 ± 0.13 [0.6208] | -0.15 ± 0.15 [0.3238] |
|                                                                      | Log life expectancy           | 0.53 ± 0.32 [0.1049]  | 0.22 ± 0.52 [0.677]   | 0.13 ± 0.66 [0.8395]  | 0.10 ± 0.80 [0.9002]  | 0.08 ± 0.84 [0.9291]  |
|                                                                      | <i>Number of species</i>      | n = 128               | n = 77                | n = 55                | n = 41                | n = 32                |

**Supplementary Table 3. - Sensitivity analysis performed to test for collinearity issues.** In order to demonstrate the lack of collinearity in models presented in Extended Data Table 3, here we present the results of models explaining variation in **a-b**, CMR and **c-d**, ICM, where body mass (**a,c**) and life expectancy (**b,d**) are entered in separate models.

|                                                          | <b>a. Effect of body mass on CMR</b> |                  |           |                                                          | <b>b. Effect of life expectancy on CMR</b> |                  |           |
|----------------------------------------------------------|--------------------------------------|------------------|-----------|----------------------------------------------------------|--------------------------------------------|------------------|-----------|
|                                                          | $\beta$ (SE)                         | z/t-value        | p-value   |                                                          | $\beta$ (SE)                               | z/t-value        | p-value   |
| <b>Probability of detecting cancer</b>                   |                                      |                  |           | <b>Probability of detecting cancer</b>                   |                                            |                  |           |
| Intercept                                                | -4.09 (1.65)                         | -2.48            | 0.0131    | Intercept                                                | -10.21 (4.24)                              | -2.41            | 0.0161    |
| Log no. individuals with post-mortem pathological record | 0.06 (0.10)                          | 0.64             | 0.5201    | Log no. individuals with post-mortem pathological record | 1.49 (0.38)                                | 3.93             | 0.0001    |
| Log body mass                                            | 1.41 (0.38)                          | 3.77             | 0.0002    | Log life expectancy                                      | 0.74 (0.47)                                | 1.59             | 0.1130    |
| <i>ModelStats</i>                                        | $Ps2 < 0.0001$                       | $s2 = 2.31$      | $n = 188$ | <i>ModelStats</i>                                        | $Ps2 = 0.0002$                             | $s2 = 1.9$       | $n = 188$ |
| <b>Weighted logistic reg.</b>                            |                                      |                  |           | <b>Weighted logistic reg.</b>                            |                                            |                  |           |
| Intercept                                                | -4.00 (0.47)                         | -8.55            | 0.0000    | Intercept                                                | -6.45 (1.62)                               | -3.97            | 0.0001    |
| Log body mass                                            | 0.01 (0.04)                          | 0.15             | 0.8784    | Log life expectancy                                      | 0.32 (0.2)                                 | 1.6              | 0.1115    |
| <i>ModelStats</i>                                        | $AIC = 369.14$                       | $\lambda = 0.57$ | $n = 141$ | <i>ModelStats</i>                                        | $AIC = 363.5$                              | $\lambda = 0.56$ | $n = 141$ |
|                                                          | <b>c. Effect of body mass on ICM</b> |                  |           |                                                          | <b>d. Effect of life expectancy on ICM</b> |                  |           |
|                                                          | $\beta$ (SE)                         | z/t-value        | p-value   |                                                          | $\beta$ (SE)                               | z/t-value        | p-value   |
| <b>Probability of detecting cancer</b>                   |                                      |                  |           | <b>Probability of detecting cancer</b>                   |                                            |                  |           |
| Intercept                                                | -4.08 (1.67)                         | -2.45            | 0.0144    | Intercept                                                | -8.45 (4.50)                               | -1.88            | 0.0603    |
| Log no. individuals with post-mortem pathological record | 1.39 (0.38)                          | 3.62             | 0.0003    | Log no. individuals with post-mortem pathological record | 1.42 (0.39)                                | 3.70             | 0.0002    |
| Log body mass                                            | 0.03 (0.1)                           | 0.26             | 0.7923    | Log life expectancy                                      | 0.54 (0.51)                                | 1.06             | 0.2875    |
| <i>ModelStats</i>                                        | $Ps2 = 0.0004$                       | $s2 = 2.12$      | $n = 169$ | <i>ModelStats</i>                                        | $Ps2 = 0.0020$                             | $s2 = 1.75$      | $n = 169$ |
| <b>Weighted logistic reg.</b>                            |                                      |                  |           | <b>Weighted logistic reg.</b>                            |                                            |                  |           |
| Intercept                                                | -3.22 (0.50)                         | -6.41            | <0.0001   | Intercept                                                | -5.62 (2.27)                               | -2.47            | 0.0148    |
| Log Body mass                                            | -0.04 (0.06)                         | -0.67            | 0.5063    | Log life expectancy                                      | 0.29 (0.28)                                | 1.03             | 0.3029    |
| <i>ModelStats</i>                                        | $AIC = 404.15$                       | $\lambda = 0.39$ | $n = 128$ | <i>ModelStats</i>                                        | $AIC = 400.26$                             | $\lambda = 0.4$  | $n = 128$ |

**Supplementary Table 4. - Sensitivity analysis performed to confirm the consistency of the results when high leverage species are included in the analyses.** In order to demonstrate the consistency of the result while including the three species excluded from the analyses presented in the main text due to their high leverages (i.e. *Lagurus lagurus*, *Cricetus cricetus*, and *Dasyuroides byrnei*), here we present models exploring the association between **a**, CMR and **b**, ICM and body mass as well as life expectancy on the entire species pool.

|                                                          | <b>a. CMR</b>  |                  |           | <b>b. ICM</b>  |                  |           |
|----------------------------------------------------------|----------------|------------------|-----------|----------------|------------------|-----------|
|                                                          | $\beta$ (SE)   | z/t-value        | p-value   | $\beta$ (SE)   | z/t-value        | p-value   |
| <b>Probability of detecting cancer</b>                   |                |                  |           |                |                  |           |
| Intercept                                                | -8.07 (4.71)   | -1.71            | 0.0870    | -6.33 (5.01)   | -1.26            | 0.2070    |
| Log no. individuals with post-mortem pathological record | 1.44 (0.38)    | 3.79             | 0.0002    | 1.37 (0.38)    | 3.57             | 0.0004    |
| Log body mass                                            | -0.03 (0.12)   | -0.27            | 0.7892    | -0.05 (0.13)   | -0.37            | 0.7126    |
| Log life expectancy                                      | 0.53 (0.54)    | 0.97             | 0.3302    | 0.33 (0.59)    | 0.55             | 0.5791    |
| <i>Model Stats.</i>                                      | $Ps2 < 0.0001$ | $s2 = 2.22$      | $n = 191$ | $Ps2 = 0.0010$ | $s2 = 2.04$      | $n = 172$ |
| <b>Weighted logistic reg.</b>                            |                |                  |           |                |                  |           |
| Intercept                                                | -6.06 (1.84)   | -3.30            | 0.0012    | -5.94 (2.41)   | -2.47            | 0.0150    |
| Log body mass                                            | -0.04 (0.05)   | -0.84            | 0.4023    | -0.10 (0.06)   | -1.53            | 0.1282    |
| Log life expectancy                                      | 0.29 (0.23)    | 1.23             | 0.2220    | 0.38 (0.31)    | 1.23             | 0.2210    |
| <i>Model Stats.</i>                                      | $AIC = 387.92$ | $\lambda = 0.61$ | $n = 144$ | $AIC = 417.41$ | $\lambda = 0.39$ | $n = 131$ |
